# Supplementary material
Source: MDPI journal article supplement (https://www.mdpi.com/2072-4292/14/10/2466)
Supplement: s1 [file s1]

## Supplementary Materials

**Table S1:** Noua Culture sites distribution in the Jijia River basin used in this work for landform classification of settlements location and habitation practices characterization during the Late Bronze Age (Slope position: Sp1 – Ridge; Sp2 – Upper slope; Sp3 – Middle slope; Sp4 – Flat area; Sp5 – Lower slope; Sp6 – Valley. Landform class: L1 - Deeply incised streams; L2 - Middle slope drainage, shallow valley; L3 - Upland drainage, headwaters; L4 - U-shaped valleys; L5 - Plains, flat areas (<5°); L6 - Open slopes (>5°); L7 - Upper slopes; L8 - Local ridges/hills in valley; L9 - Middle slope ridges, small hills in plains; L10 - Hill tops, high ridges).

| Site no. | County | LAU        | Toponym                                                                | Latitude       | Longitude      | Ashmounds | Slope position | Landform class |
|----------|--------|------------|------------------------------------------------------------------------|----------------|----------------|-----------|----------------|----------------|
| 1        | BT     | Albești    | Gârlele Morii / La Siliste / Ostrov                                    | 47°54'1.23" N  | 27°3'44" E     | -         | Sp3            | L4             |
| 2        | BT     | Albești    | La Pod /Jijia bank                                                     | 47°41'47.02" N | 27° 3'50.29" E | 1-5       | Sp4            | L4             |
| 3        | BT     | Albești    | În deal la biserică                                                    | 47°40'25" N    | 27°5'21" E     | -         | Sp1            | L9             |
| 4        | BT     | Albești    | La Șendreanu / Dâlma Șendreanu                                         | 47°39'47.49" N | 27° 5'41.36" E | 1-5       | Sp5            | L4             |
| 5        | BT     | Albești    | Bulgăria lui Bolocan                                                   | 47°39'11" N    | 27°5'46" E     | -         | Sp5            | L4             |
| 6        | BT     | Albești    | După Sat/Șătrărenilor Hill                                             | 47°39'31" N    | 27°4'34" E     | -         | Sp1            | L10            |
| 7        | BT     | Albești    | Siliște                                                                | 47°39'33" N    | 27°5'20" E     | -         | Sp2            | L4             |
| 8        | BT     | Albești    | Siliștea Crăciunilor/Dâlma lui Oatu                                    | 47°38'48" N    | 27°6'41" E     | -         | Sp4            | L4             |
| 9        | BT     | Albești    | Capu Dealului                                                          | 47°42'47" N    | 27°2'56" E     | -         | Sp4            | L4             |
| 10       | BT     | Albești    | La Biserică/La Iaz/Eastern extremity of Mășcăteni village              | 47°43'18.78" N | 27°2'39.41" E  | 1-5       | Sp5            | L4             |
| 11       | BT     | Albești    | Vatra satului/Grădina lui Iușcă/Western extremity of Mășcăteni village | 47°42'50" N    | 27°2'19" E     | -         | Sp6            | L1             |
| 12       | IS     | Andrieșeni | Ariilor/Arinilor Hill                                                  | 47°32'38" N    | 27°16'39" E    | -         | Sp5            | L4             |
| 13       | IS     | Andrieșeni | La Iaz/Pâslăriței Pond/La Islaz                                        | 47°32'27.95" N | 27°18'1.92" E  | -         | Sp1            | L10            |
| 14       | IS     | Andrieșeni | La pătrimi-Cracalia                                                    | 47°32'9.70" N  | 27°18'4.15" E  | -         | Sp3            | L4             |
| 15       | IS     | Andrieșeni | Andrieșeni village II/Terenul Școlii Generale                          | 47°31'34" N    | 27°17'13" E    | 1-5       | Sp1            | L10            |
| 16       | IS     | Andrieșeni | Holmul cel Mare                                                        | 47°30'31" N    | 27°16'59" E    | -         | Sp3            | L4             |
| 17       | IS     | Andrieșeni | La lutărie                                                             | 47°30'53.63" N | 27°15'50.56" E | 1-5       | Sp6            | L1             |
| 18       | IS     | Andrieșeni | La bulgărie                                                            | 47°33'0.86" N  | 27°15'20.69" E | 1-5       | Sp2            | L5             |
| 19       | IS     | Andrieșeni | La ghilitoare                                                          | 47°33'5" N     | 27°15'46" E    | 1-5       | Sp1            | L8             |
| 20       | IS     | Andrieșeni | La Iaz                                                                 | 47°33'40.76" N | 27°17'27.83" E | 1-5       | Sp1            | L8             |
| 21       | IS     | Aroneanu   | Șapte Oameni                                                           | 47°11'53.73" N | 27°37'20.78" E | 6-10      | Sp1            | L9             |
| 22       | IS     | Aroneanu   | Coada Iazului                                                          | 47°13'49" N    | 27°35'1" E     | 1-5       | Sp5            | L4             |
| 23       | IS     | Aroneanu   | La Chișcă                                                              | 47°13'47.88" N | 27°36'17.17" E | 6-10      | Sp3            | L4             |
| 24       | IS     | Aroneanu   | La lutărie/The pond near the village                                   | 47°12'44.14" N | 27°35'44.54" E | -         | Sp6            | L1             |
| 25       | IS     | Aroneanu   | South of the pond                                                      | 47°12'27.47" N | 27°35'20.16" E | 6-10      | Sp6            | L1             |
| 26       | IS     | Aroneanu   | The lower terrace from Dorobanț village vicinity                       | 47°13'57" N    | 27°34'29" E    | -         | Sp1            | L10            |
| 27       | IS     | Aroneanu   | The southern extremity of Dorobanț village                             | 47°12'45" N    | 27°35'51" E    | -         | Sp6            | L1             |
| 28       | IS     | Aroneanu   | The lower terrace west from the pond                                   | 47°13'5.34" N  | 27°34'56.31" E | 1-5       | Sp1            | L8             |
| 29       | IS     | Aroneanu   | Grădina lui G. Lupu                                                    | 47°12'0.55" N  | 27°35'17.51" E | -         | Sp6            | L1             |
| 30       | IS     | Aroneanu   | Tarlaua 64/2                                                           | 47°12'51.07" N | 27°34'34.81" E | 1-5       | Sp1            | L10            |
| 31       | IS     | Balș       | Popa Mort Hill                                                         | 47°15'25.01" N | 26°59'19.46" E | 11-15     | Sp1            | L8             |
| 32       | IS     | Bălțați    | Cantonul CFR nr. 38-39                                                 | 47°12'46.41" N | 27°7'22.87" E  | 1-5       | Sp1            | L8             |
| 33       | IS     | Bălțați    | Bahluieț-Pârâul Gugii confluence                                       | 47°12'53.41" N | 27°6'16.70" E  | 1-5       | Sp2            | L4             |
| 34       | IS     | Bălțați    | La Podeț                                                               | 47°12'40.91" N | 27°6'52.08" E  | -         | Sp6            | L1             |
| 35       | IS     | Bălțați    | La budăie                                                              | 47°13'12.28" N | 27°12'21.03" E | 6-10      | Sp4            | L7             |
| 36       | IS     | Bălțați    | Mădârjești Pond                                                        | 47°14'38.78" N | 27°8'42.79" E  | 6-10      | Sp2            | L4             |
| 37       | IS     | Bălțați    | North of Valea Oii village                                             | 47°14'59.45" N | 27° 5'26.78" E | 11-15     | Sp6            | L1             |
| 38       | BT     | Bălușeni   | Draxini village                                                        | 47°39'23" N    | 26°49'9" E     | -         | Sp4            | L7             |
| 39       | IS     | Belcești   | Bocancea Hill                                                          | 47°21'35.11" N | 27° 4'12.81" E | 6-10      | Sp6            | L1             |
| 40       | IS     | Belcești   | Genei Hill                                                             | 47°20'53.69" N | 27°5'38.75" E  | 6-10      | Sp1            | L8             |
| 41       | IS     | Belcești   | (Coasta) Hucului Hill/La Sondă                                         | 47°17'13.87" N | 27°8'7.70" E   | 16-20     | Sp1            | L10            |

|    |    |                 |                                                         |                |                |       |     |     |
|----|----|-----------------|---------------------------------------------------------|----------------|----------------|-------|-----|-----|
| 42 | IS | Belcești        | Scarchilor Hill                                         | 47°16'49.27" N | 27°7'51.09" E  | -     | Sp6 | L1  |
| 43 | IS | Belcești        | La Coșere                                               | 47°18'41.24" N | 27°3'43.77" E  | 6-10  | Sp1 | L10 |
| 44 | IS | Belcești        | La Fântâna Mocanului                                    | 47°18'24.10" N | 27°3'59.99" E  | 1-5   | Sp1 | L10 |
| 45 | IS | Belcești        | La Sărături                                             | 47°16'44.28" N | 27°7'10.38" E  | 1-5   | Sp1 | L10 |
| 46 | IS | Belcești        | Iezuț                                                   | 47°19'54.05" N | 27°6'45.91" E  | -     | Sp1 | L9  |
| 47 | IS | Belcești        | La grădină                                              | 47°18'0.50" N  | 27°8'0.04" E   | -     | Sp6 | L1  |
| 48 | IS | Belcești        | Cotârca                                                 | 47°19'47.04" N | 27°6'3.75" E   | -     | Sp1 | L10 |
| 49 | IS | Belcești        | Șesul lui Ștefan                                        | 47°19'13.70" N | 27°6'19.86" E  | 1-5   | Sp1 | L10 |
| 50 | IS | Belcești        | Mândra Hill/La Iaz/Pond 3/Babelor Valley                | 47°15'5.27" N  | 27°6'22.97" E  | 21-30 | Sp1 | L9  |
| 51 | IS | Belcești        | La Odaie/Curțile Boierești                              | 47°16'52.26" N | 27°4'39.34" E  | 1-5   | Sp1 | L10 |
| 52 | IS | Belcești        | La Curte                                                | 47°17'24.44" N | 27°3'43.97" E  | -     | Sp1 | L8  |
| 53 | BT | Brăești         | Zârnei Hill                                             | 47°53'20.91" N | 26°27'54.02" E | -     | Sp1 | L10 |
| 54 | BT | Brăești         | Găureanca Hill/Pe pășune II                             | 47°50'34.13" N | 26°27'12.40" E | 1-5   | Sp1 | L8  |
| 55 | IS | Brăești         | Izvoare                                                 | 47°10'47.47" N | 27°3'30.68" E  | -     | Sp6 | L1  |
| 56 | BT | Broscauți       | Ghilauca Hill                                           | 47°59'0.34" N  | 26°30'41.69" E | 16-20 | Sp1 | L8  |
| 57 | BT | Broscauți       | Lunca Vântului Hill                                     | 47°56'3.53" N  | 26°28'4.50" E  | 6-10  | Sp2 | L7  |
| 58 | BT | Broscauți       | Zahorna                                                 | 47°57'50.64" N | 26°26'34.90" E | 16-20 | Sp1 | L8  |
| 59 | BT | Broscauți       | Croci-Uluci Pond                                        | 47°58'2" N     | 26°30'39" E    | 16-20 | Sp2 | L5  |
| 60 | BT | Călărași        | Bulgăria lui Gâlcă                                      | 47°35'53" N    | 27°17'21" E    | -     | Sp1 | L10 |
| 61 | BT | Călărași        | Ogorul Popii Hill                                       | 47°37'35.54" N | 27°12'47.67" E | 6-10  | Sp6 | L1  |
| 62 | BT | Călărași        | Mihăiasa Hill/La sondă                                  | 47°35'13.34" N | 27°11'18.00" E | -     | Sp1 | L8  |
| 63 | BT | Călărași        | La Hrubă/Pogoroaia Hill                                 | 47°36'53" N    | 27°14'56" E    | -     | Sp1 | L10 |
| 64 | BT | Călărași        | Cracalia                                                | 47°34'9.53" N  | 27°16'55.96" E | 11-15 | Sp2 | L4  |
| 65 | BT | Călărași        | Cracalia Hill                                           | 47°34'37.16" N | 27°18'23.30" E | 6-10  | Sp1 | L10 |
| 66 | IS | Ceplenița       | Ion Clacă Hill                                          | 47°22'55.81" N | 27°3'32.03" E  | 16-20 | Sp3 | L4  |
| 67 | IS | Ceplenița       | Jidanului Hill                                          | 47°24'53.42" N | 27°3'48.81" E  | 6-10  | Sp5 | L4  |
| 68 | IS | Ciurea          | Râpa Hill și Fântâna la Podiș                           | 47°5'12.07" N  | 27°33'30.26" E | -     | Sp6 | L1  |
| 69 | IS | Ciurea          | Approx. 2 km NW from Ciurea train station (Baba Nicula) | 47°6'28.19" N  | 27°32'15.74" E | -     | Sp6 | L3  |
| 70 | IS | Coarnele Caprei | NW from Arama village                                   | 47°24'20.67" N | 27°6'9.74" E   | 6-10  | Sp1 | L10 |
| 71 | IS | Coarnele Caprei | Aramei Hill I                                           | 47°24'34.44" N | 27°5'10.17" E  | 6-10  | Sp2 | L7  |
| 72 | IS | Coarnele Caprei | Aramei Hill II                                          | 47°24'13.52" N | 27°5'43.71" E  | 6-10  | Sp3 | L4  |
| 73 | IS | Coarnele Caprei | Pais Pond                                               | 47°22'26.17" N | 27°9'23.20" E  | -     | Sp1 | L10 |
| 74 | IS | Coarnele Caprei | La solar                                                | 47°22'55.55" N | 27°8'42.95" E  | 6-10  | Sp2 | L4  |
| 75 | IS | Comarna         | SE from Comarna village                                 | 47°2'42.50" N  | 27°49'7.73" E  | 1-5   | Sp6 | L1  |
| 76 | IS | Comarna         | SE extremity of Comarna village                         | 47°2'45.34" N  | 27°47'51.59" E | 1-5   | Sp1 | L8  |
| 77 | IS | Comarna         | Tarlaua Mare                                            | 47°4'10.71" N  | 27°45'23.14" E | 1-5   | Sp6 | L1  |
| 78 | BT | Corlăteni       | Valea Ratoș                                             | 48°0'20.12" N  | 26°37'49.36" E | 1-5   | Sp1 | L10 |
| 79 | BT | Corlăteni       | Pășcu Hill                                              | 48°0'47.45" N  | 26°36'26.57" E | 1-5   | Sp3 | L4  |
| 80 | BT | Corlăteni       | Approx. 2,5 km along Carasa-Vorniceni road              | 47°55'37.63" N | 26°31'50.94" E | 11-15 | Sp2 | L4  |
| 81 | BT | Corlăteni       | Carasa village                                          | 47°56'13" N    | 26°30'12" E    | -     | Sp1 | L8  |
| 82 | BT | Corlăteni       | Corlăteni village                                       | 47°54'50.55" N | 26°38'28.76" E | 6-10  | Sp2 | L7  |
| 83 | BT | Corlăteni       | Cărmidăriei/La Iaz                                      | 47°55'46" N    | 26°34'5" E     | -     | Sp4 | L4  |
| 84 | BT | Corlăteni       | Pe țarină                                               | 47°55'41" N    | 26°34'47" E    | 1-5   | Sp5 | L4  |
| 85 | BT | Corlăteni       | West from Dealul Crucii village                         | 47°56'8.57" N  | 26°38'25.14" E | 1-5   | Sp1 | L10 |
| 86 | BT | Corlăteni       | Borșa Valley                                            | 47°55'32.38" N | 26°38'4.51" E  | 1-5   | Sp1 | L10 |
| 87 | BT | Corlăteni       | Godinescului Valley/Tălpeni                             | 47°56'26.91" N | 26°35'55.09" E | 1-5   | Sp6 | L1  |
| 88 | IS | Costești        | Pietrăria din Valea Hainei                              | 47°13'28.86" N | 26°55'14.02" E | -     | Sp1 | L9  |
| 89 | IS | Cotnari         | Țiglele (Țihliile) lui Baltă                            | 47°21'18.13" N | 26°56'51.91" E | 6-10  | Sp1 | L10 |
| 90 | IS | Cotnari         | Cotnari village                                         | 47°20'51.93" N | 26°56'43.78" E | -     | Sp1 | L8  |
| 91 | IS | Cotnari         | Hritoia Hill                                            | 47°21'23.81" N | 27°2'50.24" E  | 1-5   | Sp1 | L9  |
| 92 | IS | Cotnari         | La movilă                                               | 47°19'58.75" N | 27°5'12.43" E  | -     | Sp1 | L10 |

|     |    |               |                                        |                |                |       |     |     |
|-----|----|---------------|----------------------------------------|----------------|----------------|-------|-----|-----|
| 93  | IS | Cucuteni      | Gosanul Hill/Mănăstirii Hill/La Dobrin | 47°17'19.04" N | 26°55'24.83" E | -     | Sp6 | L1  |
| 94  | IS | Cucuteni      | Gostat/La bazin                        | 47°17'51.40" N | 26°55'19.17" E | -     | Sp3 | L4  |
| 95  | IS | Cucuteni      | Lângă pod                              | 47°18'8.29" N  | 26°54'45.16" E | -     | Sp6 | L1  |
| 96  | IS | Cucuteni      | Coasta Nucului I                       | 47°17'18.04" N | 26°56'2.20" E  | -     | Sp1 | L10 |
| 97  | IS | Cucuteni      | Oniș II                                | 47°14'29.33" N | 26°56'38.96" E | -     | Sp2 | L4  |
| 98  | BT | Curtești      | Hudumului Pond                         | 47°43'55" N    | 26°37'49" E    | -     | Sp6 | L1  |
| 99  | BT | Dângenii      | Dângenii Valley                        | 47°52'27.86" N | 26°58'21.55" E | 6-10  | Sp2 | L4  |
| 100 | BT | Dângenii      | La izvoare                             | 47°49'13.90" N | 26°56'8.91" E  | 11-15 | Sp6 | L1  |
| 101 | IS | Deleni        | Chetrăria / În margine                 | 47°27'58.13" N | 26°51'32.42" E | 1-5   | Sp1 | L10 |
| 102 | IS | Deleni        | Caprei Hill                            | 47°27'15.88" N | 26°57'32.53" E | 1-5   | Sp1 | L8  |
| 103 | IS | Deleni        | La școală/Terenul Școlii Generale      | 47°27'34.79" N | 26°52'40.05" E | -     | Sp5 | L4  |
| 104 | IS | Deleni        | Dodu Valley                            | 47°27'57.22" N | 26°58'56.78" E | 6-10  | Sp6 | L1  |
| 105 | IS | Deleni        | Lipanului Valley                       | 47°26'52.70" N | 26°59'11.96" E | 6-10  | Sp1 | L8  |
| 106 | IS | Deleni        | Gurguieta                              | 47°26'11.23" N | 26°54'10.40" E | -     | Sp1 | L10 |
| 107 | IS | Deleni        | Maxut village I                        | 47°26'5.64" N  | 26°53'58.93" E | -     | Sp6 | L1  |
| 108 | IS | Deleni        | Maxut village II                       | 47°26'25.23" N | 26°53'46.55" E | -     | Sp6 | L1  |
| 109 | BT | Dimăchani     | La biserică                            | 47°54'51" N    | 26°32'57" E    | -     | Sp1 | L8  |
| 110 | BT | Dimăchani     | Curtea Școlii Generale                 | 47°55'10" N    | 26°35'40" E    | -     | Sp1 | L8  |
| 111 | BT | Dobârceni     | Ciritei/Satu Nou                       | 47°51'11" N    | 27°0'14" E     | -     | Sp1 | L10 |
| 112 | BT | Dorohoi       | Iezerul Dorohoi Swamp                  | 47°58'37.26" N | 26°22'27.16" E | 6-10  | Sp1 | L9  |
| 113 | BT | Dorohoi       | Gura Urlei                             | 47°59'36.49" N | 26°22'13.16" E | 1-5   | Sp3 | L7  |
| 114 | BT | Dorohoi       | În Grădini Pond                        | 47°59'42.02" N | 26°25'26.23" E | 11-15 | Sp1 | L8  |
| 115 | IS | Dumești       | Holmului Hill                          | 47°14'55.75" N | 27°20'10.43" E | 11-15 | Sp6 | L1  |
| 116 | IS | Dumești       | Între lanurile cogenilor               | 47°9'45.12" N  | 27°20'29.57" E | 6-10  | Sp6 | L1  |
| 117 | IS | Dumești       | Cantonul Silvic                        | 47°8'53.63" N  | 27°20'13.94" E | 6-10  | Sp6 | L1  |
| 118 | IS | Dumești       | La bulgărie                            | 47°7'52.30" N  | 27°19'56.37" E | -     | Sp6 | L1  |
| 119 | IS | Erbiceni      | La curtea (grădina) boierească         | 47°15'5.05" N  | 27°15'35.36" E | -     | Sp1 | L10 |
| 120 | IS | Erbiceni      | La grădină                             | 47°16'22.95" N | 27°16'0.78" E  | -     | Sp1 | L8  |
| 121 | IS | Erbiceni      | La pepinieră                           | 47°14'40.79" N | 27°16'27.27" E | -     | Sp2 | L7  |
| 122 | IS | Erbiceni      | La râpă                                | 47°15'4.61" N  | 27°15'18.19" E | -     | Sp1 | L10 |
| 123 | IS | Erbiceni      | Cimitirului Hill                       | 47°15'49.12" N | 27°13'14.54" E | -     | Sp6 | L1  |
| 124 | IS | Erbiceni      | Dochia                                 | 47°18'37.67" N | 27°16'48.60" E | 6-10  | Sp6 | L1  |
| 125 | IS | Erbiceni      | Spinoasei Pond/Valea Lungă             | 47°18'54.75" N | 27°11'9.14" E  | 16-20 | Sp6 | L1  |
| 126 | IS | Erbiceni      | Conul de dejecție la nord de halta CFR | 47°15'43.46" N | 27°10'18.72" E | -     | Sp6 | L1  |
| 127 | IS | Erbiceni      | Drumul Poștei Hill                     | 47°18'52.03" N | 27°10'41.66" E | 6-10  | Sp6 | L1  |
| 128 | IS | Erbiceni      | Turac Hill                             | 47°16'53.93" N | 27°9'23.05" E  | 6-10  | Sp1 | L8  |
| 129 | IS | Erbiceni      | Poala Catargului/Coasta Budei          | 47°15'9.81" N  | 27°10'13.83" E | 1-5   | Sp1 | L10 |
| 130 | IS | Erbiceni      | La odaie                               | 47°16'22.41" N | 27°17'24.78" E | 1-5   | Sp6 | L1  |
| 131 | IS | Fântânele     | Ghica Pond                             | 47°25'17.15" N | 27°8'44.28" E  | 6-10  | Sp6 | L1  |
| 132 | IS | Fântânele     | Fântânele village-Cimitirul Ortodox    | 47°24'50.57" N | 27°11'19.90" E | 16-20 | Sp1 | L8  |
| 133 | BT | Flămânzi      | Cuirari/Ciurari Hill                   | 47°30'59" N    | 26°58'42" E    | -     | Sp1 | L10 |
| 134 | BT | Flămânzi      | Fasoliște                              | 47°33'6" N     | 26°59'4" E     | -     | Sp3 | L7  |
| 135 | IS | Focuri        | Lacului Hill                           | 47°20'48.29" N | 27°14'11.38" E | 6-10  | Sp6 | L1  |
| 136 | IS | Focuri        | Păișului Hill                          | 47°21'38.20" N | 27°8'56.82" E  | 21-30 | Sp1 | L8  |
| 137 | IS | Focuri        | Rotund Hill                            | 47°21'55.03" N | 27°11'19.14" E | 6-10  | Sp6 | L1  |
| 138 | IS | Focuri        | The exit of Focuri village             | 47°21'41.20" N | 27°13'23.67" E | 1-5   | Sp6 | L1  |
| 139 | IS | Focuri        | Lutărie                                | 47°21'46.71" N | 27°12'39.14" E | 1-5   | Sp1 | L8  |
| 140 | IS | Focuri        | Podul lui Grunzu                       | 47°20'37.17" N | 27°12'54.99" E | -     | Sp6 | L1  |
| 141 | BT | Frumușica     | La biserică                            | 47°30'59" N    | 26°52'34" E    | -     | Sp2 | L4  |
| 142 | BT | George Enescu | Bodoroanca                             | 48°1'34" N     | 26°29'18" E    | -     | Sp1 | L8  |
| 143 | BT | George Enescu | Cotu Morii/Tarlaua Vedeanu/Cimitir     | 48°0'17.84" N  | 26°34'0.52" E  | 11-15 | Sp1 | L8  |
| 144 | BT | George Enescu | North of Dumeni village                | 48°1'11.28" N  | 26°32'14.44" E | 1-5   | Sp6 | L3  |
| 145 | BT | George Enescu | Țarna din Vale/Pe Ghenghioia           | 48°1'4" N      | 26°32'2" E     | -     | Sp1 | L10 |
| 146 | BT | George        | Liteanca (de Sus)                      | 48°1'44.86" N  | 26°29'49.23" E | 6-10  | Sp1 | L8  |

|     |    |               |                                         |                |                |       |     |     |
|-----|----|---------------|-----------------------------------------|----------------|----------------|-------|-----|-----|
|     |    | Enescu        |                                         |                |                |       |     |     |
| 147 | IS | Golăești      | Râpa spânzuratului                      | 47°14'13.48" N | 27°40'38.17" E | -     | Sp1 | L10 |
| 148 | IS | Gropnița      | La țarina veche                         | 47°22'41.98" N | 27°15'43.85" E | 21-30 | Sp6 | L1  |
| 149 | IS | Gropnița      | De ceea parte Hill                      | 47°20'50.56" N | 27°16'3.49" E  | 11-15 | Sp6 | L1  |
| 150 | IS | Gropnița      | SE extremity of Gropnița village        | 47°20'19.53" N | 27°17'37.16" E | 11-15 | Sp6 | L1  |
| 151 | IS | Gropnița      | West of the lake                        | 47°22'4.60" N  | 27°19'58.83" E | 6-10  | Sp4 | L7  |
| 152 | IS | Hârlău        | Curtea domnească                        | 47°25'34.85" N | 26°53'52.13" E | -     | Sp1 | L8  |
| 153 | IS | Hârlău        | Nicolina valley                         | 47°26'20.82" N | 26°55'8.76" E  | 1-5   | Sp6 | L2  |
| 154 | IS | Hârlău        | Hârlău center                           | 47°25'44.97" N | 26°53'54.87" E | -     | Sp6 | L1  |
| 155 | BT | Hilișeu-Horia | Urlei Hill/Gura Urlei/Peste Iezer       | 48°0'9.80" N   | 26°22'4.55" E  | 11-15 | Sp6 | L1  |
| 156 | BT | Hlipiceni     | Șurile Vechi Lakes                      | 47°34'2.34" N  | 27°4'47.25" E  | 1-5   | Sp3 | L4  |
| 157 | BT | Hlipiceni     | Pe podiș                                | 47°34'41.83" N | 27°10'23.07" E | -     | Sp2 | L4  |
| 158 | BT | Hlipiceni     | La biserică Hill                        | 47°36'15" N    | 27°9'34" E     | -     | Sp6 | L1  |
| 159 | BT | Hlipiceni     | La cimitir                              | 47°35'50.16" N | 27°11'1.29" E  | 6-10  | Sp1 | L10 |
| 160 | BT | Hlipiceni     | La moviță                               | 47°36'25" N    | 27°9'5" E      | -     | Sp1 | L8  |
| 161 | IS | Holboca       | Chirița Pond                            | 47°9'44.47" N  | 27°39'4.23" E  | 6-10  | Sp1 | L10 |
| 162 | IS | Holboca       | Eastern extremity of Dancu village      | 47°9'26.87" N  | 27°40'28.81" E | 6-10  | Sp1 | L10 |
| 163 | IS | Holboca       | Cantonul / Cantonul 283                 | 47°8'28.21" N  | 27°43'51.49" E | -     | Sp6 | L1  |
| 164 | IS | Holboca       | Cimitirul animalelor                    | 47°10'3.59" N  | 27°42'38.84" E | 1-5   | Sp6 | L1  |
| 165 | IS | Holboca       | La cimitir/ Izvorul Pândarului          | 47°9'4.43" N   | 27°42'10.32" E | 1-5   | Sp1 | L10 |
| 166 | IS | Holboca       | The exit of Holboca village             | 47°9'5.06" N   | 27°41'56.30" E | 6-10  | Sp2 | L7  |
| 167 | IS | Holboca       | Peste baltă/Pârliți                     | 47°10'12.96" N | 27°41'55.82" E | 1-5   | Sp6 | L3  |
| 168 | IS | Holboca       | Șapte oameni                            | 47°11'34.50" N | 27°38'27.35" E | 11-15 | Sp6 | L3  |
| 169 | IS | Holboca       | Spre pădure                             | 47°11'57.65" N | 27°39'2.88" E  | 1-5   | Sp2 | L4  |
| 170 | IS | Holboca       | Valea satului                           | 47°13'24.61" N | 27°40'35.61" E | -     | Sp1 | L8  |
| 171 | IS | Horlești      | Coșere II                               | 47°8'2.19" N   | 27°23'33.33" E | -     | Sp1 | L10 |
| 172 | IS | Horlești      | La răchiți                              | 47°7'31.76" N  | 27°23'26.75" E | -     | Sp1 | L10 |
| 173 | IS | Horlești      | Viișoara Hill                           | 47°7'38.00" N  | 27°24'5.02" E  | -     | Sp1 | L9  |
| 174 | IS | Iași          | Eastern extremity of Vasile Lupu street | 47°9'22.17" N  | 27°37'28.20" E | 1-5   | Sp6 | L1  |
| 175 | IS | Iași          | Păcureț neighborhood                    | 47°11'12.87" N | 27°32'15.98" E | -     | Sp2 | L7  |
| 176 | IS | Iași          | Câmpul de aviație                       | 47°9'11.99" N  | 27°38'34.53" E | -     | Sp6 | L2  |
| 177 | IS | Iași          | Ceairu lui Peretz                       | 47°10'38.41" N | 27°32'36.88" E | 1-5   | Sp1 | L10 |
| 178 | IS | Iași          | Crucea Armenească                       | 47°9'0.97" N   | 27°34'23.04" E | -     | Sp6 | L1  |
| 179 | IS | Iași          | Fabrica de cărămizi și țigle            | 47°8'27.78" N  | 27°38'26.32" E | -     | Sp3 | L4  |
| 180 | IS | Iași          | Groapa lui Vodă                         | 47°11'36.34" N | 27°34'42.99" E | -     | Sp6 | L3  |
| 181 | IS | Iași          | La Nicolau                              | 47°9'51.71" N  | 27°37'48.83" E | -     | Sp2 | L7  |
| 182 | IS | Iași          | Nicolina                                | 47°7'3.31" N   | 27°34'19.64" E | -     | Sp6 | L1  |
| 183 | IS | Iași          | Târgușorul Nicolina I                   | 47°9'2.10" N   | 27°32'45.13" E | 1-5   | Sp1 | L10 |
| 184 | IS | Iași          | Seacă/Fântânilor Valley                 | 47°8'32.75" N  | 27°32'58.90" E | -     | Sp6 | L1  |
| 185 | BT | Ibănești      | Miron Hill                              | 48°1'42.95" N  | 26°25'19.03" E | 6-10  | Sp1 | L8  |
| 186 | BT | Ibănești      | Cotu Brumă-Drăgulea                     | 48°2'48" N     | 26°25'57" E    | 6-10  | Sp1 | L8  |
| 187 | IS | Ion Neculce   | Siliștea Schitului                      | 47°12'12.24" N | 27°1'10.13" E  | -     | Sp3 | L7  |
| 188 | IS | Ion Neculce   | Cantonul 24                             | 47°13'39.93" N | 27°2'32.42" E  | -     | Sp5 | L4  |
| 189 | IS | Ion Neculce   | North of the railroad                   | 47°12'57.32" N | 27°5'45.73" E  | 16-20 | Sp2 | L4  |
| 190 | IS | Ion Neculce   | West of Războieni village               | 47°13'21.25" N | 27°1'31.97" E  | -     | Sp6 | L1  |
| 191 | BT | Leorda        | Ochiului Valley                         | 47°49'0.40" N  | 26°31'24.06" E | 11-15 | Sp6 | L1  |
| 192 | IS | Lețcani       | Din mijloc Hill                         | 47°14'17.13" N | 27°26'8.94" E  | 11-15 | Sp2 | L4  |
| 193 | IS | Lețcani       | The plateau SE of Bogonos village       | 47°11'55.32" N | 27°26'35.39" E | 6-10  | Sp3 | L7  |
| 194 | IS | Lețcani       | La coșere                               | 47°9'17.88" N  | 27°22'20.95" E | -     | Sp6 | L1  |
| 195 | IS | Lețcani       | La fântâna Lungului                     | 47°10'0.74" N  | 27°22'47.39" E | 6-10  | Sp1 | L10 |
| 196 | IS | Lețcani       | La lutărie                              | 47°10'0.04" N  | 27°24'25.21" E | -     | Sp1 | L8  |
| 197 | IS | Lețcani       | La moară/Rușilor Hill                   | 47°9'31.88" N  | 27°24'28.80" E | 1-5   | Sp6 | L1  |
| 198 | IS | Lețcani       | Poarta Hăsnășenilor                     | 47°9'46.87" N  | 27°22'32.52" E | -     | Sp6 | L1  |
| 199 | IS | Lețcani       | The terrace south of Cucuteni village   | 47°8'30.36" N  | 27°24'40.11" E | -     | Sp3 | L7  |
| 200 | IS | Lețcani       | Bulgăriei Pond                          | 47°12'46.46" N | 27°22'49.81" E | -     | Sp1 | L9  |
| 201 | IS | Lețcani       | La Damian/Hanul Poștei                  | 47°13'9.16" N  | 27°24'23.89" E | 6-10  | Sp1 | L8  |
| 202 | IS | Lețcani       | La lutărie                              | 47°12'16.39" N | 27°23'30.69" E | 6-10  | Sp6 | L1  |
| 203 | IS | Lețcani       | South-eastern extremity of Lețcani      | 47°11'28.65" N | 27°25'43.28" E | 1-5   | Sp5 | L4  |

|     |    |                | village                                     |                |                 |       |     |     |
|-----|----|----------------|---------------------------------------------|----------------|-----------------|-------|-----|-----|
| 204 | IS | Lețcani        | Movila din șes                              | 47°12'31.19" N | 27°20'56.79" E  | 1-5   | Sp2 | L4  |
| 205 | IS | Lețcani        | Ilenii Valley                               | 47°11'51.14" N | 27°23'8.60" E   | 1-5   | Sp1 | L8  |
| 206 | IS | Lețcani        | Lețcani village/Terasa de la biserică       | 47°11'31.20" N | 27°24'58.01" E  | -     | Sp1 | L8  |
| 207 | BT | Lunca          | Bahnă/La bazine                             | 47°37'55" N    | 26°57'36" E     | -     | Sp1 | L8  |
| 208 | IS | Lungani        | După biserică                               | 47°10'54" N    | 27°8'29" E      | -     | Sp3 | L4  |
| 209 | IS | Lungani        | La șipot                                    | 47°11'24.92" N | 27°7'33.73" E   | -     | Sp6 | L1  |
| 210 | BT | Mihai Eminescu | Iazul Părăsit                               | 47°47'19.67" N | 26°34'24.44" E  | 16-20 | Sp1 | L10 |
| 211 | BT | Mihai Eminescu | La podul spre Brăiasca                      | 47°45'47" N    | 26°35'5" E      | -     | Sp1 | L10 |
| 212 | BT | Mihai Eminescu | La salcâmii lui Cramă                       | 47°45'6" N     | 26°34'45" E     | -     | Sp2 | L7  |
| 213 | BT | Mihai Eminescu | La scurtături                               | 47°48'29.12" N | 26°33'3.16" E   | 6-10  | Sp3 | L4  |
| 214 | BT | Mihai Eminescu | Ceir/Punctul Experimental Agricol           | 47°47'21" N    | 26°30'56" E     | -     | Sp1 | L10 |
| 215 | BT | Mihai Eminescu | Curtea Veche                                | 47°47'3.99" N  | 26°31'41.28" E  | -     | Sp6 | L1  |
| 216 | BT | Mihai Eminescu | În săliște                                  | 47°46'30" N    | 26°31'43" E     | -     | Sp6 | L1  |
| 217 | BT | Mihai Eminescu | Medeleni                                    | 47°47'13" N    | 26°32'36" E     | -     | Sp3 | L4  |
| 218 | BT | Mihai Eminescu | Șleahul Dorohoiului                         | 47°48'3" N     | 26°34'33" E     | -     | Sp1 | L9  |
| 219 | IS | Miroslava      | Holm/Brătuleni Hill                         | 47°10'55.75" N | 27°25'40.19" E  | -     | Sp2 | L4  |
| 220 | IS | Miroslava      | Ciurbeștilor Hill, towards Cornești village | 47°5'53.83" N  | 27°31'0.19" E   | -     | Sp6 | L1  |
| 221 | IS | Miroslava      | Tarlaua Fermă                               | 47°6'26.69" N  | 27°30'23.47" E  | -     | Sp6 | L1  |
| 222 | IS | Miroslava      | Cornești village                            | 47°6'50.01" N  | 27°30'45.32" E  | 1-5   | Sp6 | L1  |
| 223 | IS | Miroslava      | NW from the farm                            | 47°7'23.32" N  | 27°31'50.58" E  | -     | Sp1 | L10 |
| 224 | IS | Miroslava      | Miroslava Hill II                           | 47°9'23.00" N  | 27°30'59.86" E  | -     | Sp6 | L1  |
| 225 | IS | Mogoșești      | Santa Hill                                  | 47°2'52.06" N  | 27°31'46.50" E  | 1-5   | Sp1 | L8  |
| 226 | IS | Mogoșești      | Staniște                                    | 47°3'16.94" N  | 27°30'31.36" E  | -     | Sp1 | L8  |
| 227 | IS | Movileni       | La grădină                                  | 47°19'29.75" N | 27°23'45.18" E  | 1-5   | Sp1 | L8  |
| 228 | IS | Movileni       | Movila Bașcauș                              | 47°18'33.64" N | 27°23'31.20" E  | 1-5   | Sp1 | L10 |
| 229 | IS | Movileni       | Țarina Largă                                | 47°19'22.32" N | 27°23'1.41" E   | 6-10  | Sp1 | L10 |
| 230 | IS | Movileni       | La Podiș                                    | 47°19'51.49" N | 27°21'34.69" E  | -     | Sp3 | L7  |
| 231 | IS | Movileni       | Buda                                        | 47°19'55.14" N | 27°18'36.30" E  | 1-5   | Sp6 | L1  |
| 232 | IS | Movileni       | Amara Hill                                  | 47°18'51.01" N | 27°21'7.82" E   | 1-5   | Sp1 | L8  |
| 233 | BT | Nicșeni        | Jidanului Hill                              | 47°53'34.85" N | 26°37'14.54" E  | 1-5   | Sp1 | L10 |
| 234 | BT | Nicșeni        | Vlanic Hill                                 | 47°54'25.86" N | 26°38'7.15" E   | 6-10  | Sp1 | L10 |
| 235 | BT | Nicșeni        | Hriboiaia Valley                            | 47°53'49.61" N | 26°38'36.572" E | 1-5   | Sp6 | L1  |
| 236 | IS | Plugari        | Țiganca I                                   | 47°29'5.82" N  | 27°5'50.67" E   | -     | Sp6 | L1  |
| 237 | IS | Plugari        | Păpușoiului Valley                          | 47°27'8.906" N | 27°5'34.465" E  | 11-15 | Sp3 | L6  |
| 238 | IS | Plugari        | La Pod                                      | 47°28'55.79" N | 27°6'36.01" E   | -     | Sp6 | L1  |
| 239 | IS | Plugari        | Cotu Beicului                               | 47°29'24.80" N | 27°5'7.78" E    | 6-10  | Sp1 | L8  |
| 240 | IS | Plugari        | Pârâul lui Vasile                           | 47°30'37.42" N | 27°5'46.19" E   | 11-15 | Sp1 | L8  |
| 241 | IS | Podu Iloaiei   | La fermă                                    | 47°12'49.77" N | 27°14'47.14" E  | -     | Sp1 | L10 |
| 242 | IS | Podu Iloaiei   | Southern slope of Holm Hill                 | 47°12'15.55" N | 27°18'53.77" E  | -     | Sp1 | L8  |
| 243 | IS | Podu Iloaiei   | Heciu/Henciu Hill                           | 47°13'32.73" N | 27°17'52.40" E  | -     | Sp6 | L1  |
| 244 | IS | Podu Iloaiei   | Popești Hill                                | 47°13'2.05" N  | 27°16'39.00" E  | -     | Sp6 | L1  |
| 245 | IS | Podu Iloaiei   | Țintei Hill (Roata+La deal de sat)          | 47°14'20.35" N | 27°15'43.33" E  | -     | Sp1 | L8  |
| 246 | IS | Podu Iloaiei   | The mound near Totoești village             | 47°13'59.91" N | 27°16'27.70" E  | 6-10  | Sp6 | L1  |
| 247 | IS | Podu Iloaiei   | Bahlui River terrace I                      | 47°14'15.51" N | 27°16'6.08" E   | 1-5   | Sp6 | L1  |
| 248 | IS | Popești        | Gagea Hill                                  | 47°9'46.37" N  | 27°15'4.08" E   | -     | Sp1 | L10 |
| 249 | IS | Popești        | Satului Hill                                | 47°9'29.90" N  | 27°15'30.68" E  | 1-5   | Sp1 | L9  |
| 250 | IS | Popești        | Viilor Hill I                               | 47°10'39" N    | 27°15'51" E     | -     | Sp1 | L10 |
| 251 | IS | Popești        | Fântâna Cazacului                           | 47°10'58.96" N | 27°15'55.94" E  | 1-5   | Sp6 | L1  |

|     |    |            |                                       |                |                |       |     |     |
|-----|----|------------|---------------------------------------|----------------|----------------|-------|-----|-----|
| 252 | IS | Popești    | Gropul Morii                          | 47°9'31.06" N  | 27°17'21.40" E | -     | Sp6 | L1  |
| 253 | IS | Popești    | În sărături                           | 47°10'3.90" N  | 27°14'50.12" E | -     | Sp6 | L1  |
| 254 | IS | Popești    | La gârla lui Asaftei                  | 47°8'18.68" N  | 27°14'17.06" E | 1-5   | Sp6 | L1  |
| 255 | IS | Popricani  | Cârlig Hill/North of Cârlig village   | 47°13'20.93" N | 27°33'18.23" E | 6-10  | Sp6 | L1  |
| 256 | IS | Popricani  | Popa Ioan Hill                        | 47°13'9.13" N  | 27°33'31.14" E | -     | Sp6 | L1  |
| 257 | IS | Popricani  | Cârlig village                        | 47°12'42.73" N | 27°33'51.49" E | 1-5   | Sp6 | L1  |
| 258 | IS | Popricani  | Grindul de la pod                     | 47°18'2.52" N  | 27°33'15.06" E | -     | Sp6 | L1  |
| 259 | IS | Popricani  | La șanț                               | 47°18'31.59" N | 27°32'21.69" E | -     | Sp1 | L9  |
| 260 | IS | Popricani  | Toloaca/Lutărie                       | 47°17'55.62" N | 27°33'22.04" E | -     | Sp6 | L1  |
| 261 | IS | Popricani  | Cuza Vodă Hill I                      | 47°14'21.97" N | 27°34'44.28" E | 1-5   | Sp6 | L1  |
| 262 | IS | Popricani  | Cuza Vodă village                     | 47°14'10.52" N | 27°34'27.04" E | -     | Sp6 | L1  |
| 263 | IS | Popricani  | Căramidărie/Grădina lui Anton         | 47°18'10.83" N | 27°30'29.03" E | -     | Sp6 | L1  |
| 264 | IS | Popricani  | Coasta Ciriteilor Mari                | 47°17'26.15" N | 27°32'27.79" E | -     | Sp6 | L1  |
| 265 | IS | Popricani  | Coasta Popricanilor                   | 47°17'15.00" N | 27°30'5.62" E  | -     | Sp1 | L10 |
| 266 | IS | Popricani  | Humă Hill                             | 47°17'18.48" N | 27°33'32.10" E | -     | Sp1 | L10 |
| 267 | IS | Popricani  | La izlaz                              | 47°17'59.68" N | 27°29'38.64" E | 1-5   | Sp6 | L1  |
| 268 | IS | Popricani  | Rufeni/Bursucăriei Hill               | 47°13'41.22" N | 27°31'18.60" E | 11-15 | Sp1 | L8  |
| 269 | IS | Popricani  | Rufeni                                | 47°13'47.60" N | 27°32'13.14" E | 6-10  | Sp1 | L8  |
| 270 | IS | Popricani  | Hârtopul Ghindei                      | 47°15'9.37" N  | 27°31'16.47" E | 11-15 | Sp6 | L1  |
| 271 | BT | Prăjeni    | Iazul Vechi                           | 47°27'46" N    | 27°1'38" E     | 1-5   | Sp3 | L4  |
| 272 | BT | Prăjeni    | Cap Iaz                               | 47°27'53.15" N | 27°4'33.50" E  | 6-10  | Sp3 | L4  |
| 273 | BT | Prăjeni    | Centre of Prăjeni village             | 47°30'6" N     | 27°0'34" E     | -     | Sp1 | L8  |
| 274 | BT | Prăjeni    | Lutărie                               | 47°30'59" N    | 26°59'21" E    | -     | Sp4 | L4  |
| 275 | BT | Prăjeni    | Valea Rea                             | 47°30'15" N    | 27°2'18" E     | -     | Sp1 | L10 |
| 276 | IS | Probotă    | Bulgărie/La Grădinărie                | 47°23'18.72" N | 27°30'30.86" E | -     | Sp6 | L1  |
| 277 | IS | Probotă    | Dâmbul Colacului                      | 47°22'40.01" N | 27°30'35.98" E | -     | Sp1 | L8  |
| 278 | IS | Probotă    | East of Frasin watercourse            | 47°23'6.59" N  | 27°29'59.03" E | 6-10  | Sp6 | L1  |
| 279 | IS | Răducăneni | Balta Popii                           | 46°56'53.07" N | 28°1'58.21" E  | -     | Sp1 | L8  |
| 280 | BT | Răuseni    | Doinei Valley                         | 47°32'1" N     | 27°10'31" E    | -     | Sp1 | L10 |
| 281 | BT | Răuseni    | Podișul Curcanului Hill               | 47°34'24.01" N | 27°11'34.32" E | 6-10  | Sp3 | L4  |
| 282 | BT | Răuseni    | La cimitir                            | 47°33'11.36" N | 27°13'49.01" E | 6-10  | Sp6 | L1  |
| 283 | BT | Răuseni    | La movilă/Ursu mound                  | 47°31'52" N    | 27°14'42" E    | -     | Sp6 | L1  |
| 284 | BT | Răuseni    | La odaie                              | 47°34'11" N    | 27°11'27" E    | -     | Sp4 | L4  |
| 285 | BT | Răuseni    | Northern extremity of Răuseni village | 47°34'8" N     | 27°12'49" E    | -     | Sp1 | L10 |
| 286 | IS | Rădu       | Mârzești Forest                       | 47°14'49.18" N | 27°28'44.86" E | 1-5   | Sp1 | L10 |
| 287 | IS | Rădu       | Boteștii cu Vișoara Hill              | 47°16'52.21" N | 27°26'41.83" E | -     | Sp1 | L10 |
| 288 | IS | Rădu       | Bădărău neighborhood                  | 47°11'47.21" N | 27°30'58.39" E | 6-10  | Sp1 | L8  |
| 289 | IS | Rădu       | La gunoiște                           | 47°12'17.82" N | 27°31'34.65" E | 6-10  | Sp6 | L3  |
| 290 | IS | Rădu       | Valea Mută                            | 47°11'39.93" N | 27°29'50.78" E | 6-10  | Sp6 | L1  |
| 291 | IS | Rădu       | Hârtopul lingurariului                | 47°14'21.91" N | 27°28'23.38" E | 11-15 | Sp1 | L8  |
| 292 | IS | Rădu       | Vatra Apăreștilor                     | 47°14'8.43" N  | 27°28'8.76" E  | 1-5   | Sp6 | L1  |
| 293 | BT | Roma       | Cotu Popii                            | 47°51'38.97" N | 26°33'14.52" E | 11-15 | Sp6 | L1  |
| 294 | BT | Roma       | La rugi/Calul Alb                     | 47°50'56" N    | 26°31'56" E    | -     | Sp1 | L10 |
| 295 | BT | Roma       | Balta lui Ciobanu                     | 47°49'33" N    | 26°34'49" E    | 6-10  | Sp1 | L10 |
| 296 | BT | Roma       | Botoșanca Hill                        | 47°48'48.91" N | 26°36'54.35" E | 6-10  | Sp3 | L4  |
| 297 | IS | Românești  | Prosia                                | 47°14'50.78" N | 27°22'13.85" E | 6-10  | Sp1 | L8  |
| 298 | IS | Românești  | Tarlaua Ciudin-Căzăreni               | 47°15'40.07" N | 27°22'30.41" E | 1-5   | Sp1 | L10 |
| 299 | IS | Românești  | În cățălu                             | 47°16'20.06" N | 27°19'26.50" E | -     | Sp6 | L1  |
| 300 | IS | Românești  | În țarnă                              | 47°16'26.22" N | 27°19'51.83" E | 1-5   | Sp1 | L10 |
| 301 | IS | Românești  | Valea părului                         | 47°16'3.05" N  | 27°19'13.77" E | -     | Sp1 | L10 |
| 302 | IS | Românești  | Lângă movilă                          | 47°15'50.94" N | 27°23'11.94" E | -     | Sp1 | L10 |
| 303 | IS | Scobinți   | Moara de Vânt Hill                    | 47°26'7.78" N  | 27°2'21.52" E  | 16-20 | Sp1 | L10 |
| 304 | IS | Scobinți   | Gurguieta I                           | 47°24'29.16" N | 27°0'44.44" E  | 6-10  | Sp1 | L8  |
| 305 | IS | Scobinți   | Gurguieta II                          | 47°24'41.25" N | 27°1'19.56" E  | 6-10  | Sp3 | L4  |
| 306 | IS | Sinești    | Budoaia Hill                          | 47°8'5.63" N   | 27°8'44.67" E  | 1-5   | Sp1 | L10 |
| 307 | BT | Stăuceni   | Ostrovul Mare Hill                    | 47°45'10.62" N | 26°45'5.00" E  | 6-10  | Sp6 | L1  |
| 308 | IS | Strunga    | Criva-Haina interfluve                | 47°12'0.89" N  | 26°57'43.13" E | 6-10  | Sp6 | L1  |
| 309 | IS | Strunga    | La Hârtop-Spre Budăi                  | 47°12'3.87" N  | 26°54'54.74" E | -     | Sp1 | L10 |

|     |    |               |                                              |                |                |       |     |     |
|-----|----|---------------|----------------------------------------------|----------------|----------------|-------|-----|-----|
| 310 | IS | Strunga       | La lutărie                                   | 47°11'21.83" N | 26°56'45.08" E | -     | Sp1 | L8  |
| 311 | IS | Strunga       | SE of Gura Văii village                      | 47°11'21.22" N | 26°56'53.10" E | 6-10  | Sp2 | L4  |
| 312 | IS | Strunga       | Indicator kilometric 23                      | 47°11'42.16" N | 26°58'30.37" E | -     | Sp1 | L8  |
| 313 | BT | Sulița        | Near Dracșani village                        | 47°36'52.74" N | 26°57'2.29" E  | -     | Sp6 | L3  |
| 314 | BT | Șendriceni    | W of Buhaiul watercourse                     | 47°58'1.64" N  | 26°20'7.48" E  | 6-10  | Sp1 | L10 |
| 315 | IS | Șipote        | La movila mămăligii Hill                     | 47°25'47.89" N | 27°17'29.26" E | 1-5   | Sp1 | L10 |
| 316 | IS | Șipote        | Călugăra                                     | 47°31'20.30" N | 27°10'40.28" E | 11-15 | Sp2 | L4  |
| 317 | IS | Șipote        | Dâmbul din șesul poștei                      | 47°28'29.28" N | 27°13'23.55" E | -     | Sp6 | L1  |
| 318 | IS | Șipote        | Coroleuca Pond                               | 47°30'35.78" N | 27° 8'58.45" E | 11-15 | Sp1 | L8  |
| 319 | IS | Târgu-Frumos  | Hârtopului Hill                              | 47°15'34.40" N | 27° 0'45.92" E | 11-15 | Sp1 | L8  |
| 320 | BT | Todireni      | Curtii Hill                                  | 47°36'24" N    | 27°6'14" E     | -     | Sp6 | L1  |
| 321 | BT | Todireni      | Hârtopul Căldării                            | 47°39'5.90" N  | 27°10'25.77" E | 21-30 | Sp3 | L4  |
| 322 | IS | Tomești       | Doamnei Hill I                               | 47°7'25.67" N  | 27°44'47.92" E | -     | Sp6 | L1  |
| 323 | IS | Tomești       | Opcina/Opinca/Tomești village                | 47°7'14.64" N  | 27°42'12.17" E | -     | Sp3 | L7  |
| 324 | IS | Tomești       | Jijia terrace                                | 47°7'35.19" N  | 27°44'16.15" E | -     | Sp6 | L1  |
| 325 | IS | Tomești       | Schitul Vlădiceni                            | 47°7'46.65" N  | 27°39'39.62" E | -     | Sp6 | L1  |
| 326 | BT | Trușești      | La lutărie                                   | 47°49'1.18" N  | 26°58'38.55" E | 1-5   | Sp6 | L1  |
| 327 | BT | Trușești      | În siliște                                   | 47°45'55" N    | 26°58'3" E     | -     | Sp1 | L8  |
| 328 | BT | Trușești      | Țintirim                                     | 47°44'10" N    | 27°1'1" E      | 6-10  | Sp1 | L8  |
| 329 | BT | Trușești      | Cantonul CFR nr.47                           | 47°46'17.72" N | 26°59'52.26" E | 6-10  | Sp1 | L10 |
| 330 | BT | Trușești      | La capac                                     | 47°44'14" N    | 27°1'42" E     | -     | Sp6 | L1  |
| 331 | BT | Trușești      | La grui                                      | 47°44'37" N    | 27°1'26" E     | -     | Sp1 | L8  |
| 332 | BT | Trușești      | Movila din șesul Jijiei/Puturosul            | 47°43'53" N    | 27°1'44" E     | 1-5   | Sp1 | L8  |
| 333 | BT | Trușești      | Trușești village/La dâmboc                   | 47°45'49.10" N | 27°0'36.33" E  | -     | Sp6 | L1  |
| 334 | IS | Țigănași      | Școala veche                                 | 47°20'39.27" N | 27°30'43.25" E | -     | Sp5 | L4  |
| 335 | IS | Țigănași      | Cârnicieni village II                        | 47°20'36.19" N | 27°29'51.87" E | 1-5   | Sp3 | L4  |
| 336 | IS | Țigănași      | ESE extremity of Mihail Kogălniceanu village | 47°20'37.37" N | 27°25'36.54" E | 1-5   | Sp1 | L10 |
| 337 | IS | Țuțora        | La Onuțu/Lotul bisericii                     | 47°6'55.06" N  | 27°45'45.32" E | -     | Sp1 | L10 |
| 338 | IS | Țuțora        | Gădilita/Toloacă/La vale                     | 47°7'35.67" N  | 27°46'39.05" E | -     | Sp5 | L4  |
| 339 | IS | Țuțora        | Gura cotului lui Timaru                      | 47°8'31.99" N  | 27°46'44.05" E | 1-5   | Sp6 | L1  |
| 340 | BT | Ungureni      | Coasta Jijiei/Anton Hill                     | 47°54'1.23" N  | 26°44'26.62" E | 11-15 | Sp6 | L1  |
| 341 | BT | Ungureni      | Dubina Hill                                  | 47°55'47.94" N | 26°45'1.87" E  | 11-15 | Sp1 | L8  |
| 342 | BT | Ungureni      | Ibăneasa                                     | 47°57'20.11" N | 26°44'25.83" E | 1-5   | Sp1 | L8  |
| 343 | BT | Ungureni      | West of Epureni village                      | 47°52'19" N    | 26°49'16" E    | -     | Sp1 | L8  |
| 344 | IS | Valea Lupului | Fabrica Chimică                              | 47°10'29.78" N | 27°29'43.96" E | 1-5   | Sp2 | L4  |
| 345 | IS | Valea Lupului | Stâncii Hill                                 | 47°16'44.17" N | 27°33'29.23" E | 6-10  | Sp1 | L8  |
| 346 | IS | Vlădeni       | Southern slope of Iacobeni Hill              | 47°27'36.77" N | 27°17'15.28" E | 1-5   | Sp1 | L8  |
| 347 | IS | Vlădeni       | La șipoțel                                   | 47°26'6.49" N  | 27°18'11.03" E | -     | Sp2 | L4  |
| 348 | IS | Vlădeni       | Pe grind                                     | 47°26'58.46" N | 27°19'34.32" E | -     | Sp6 | L1  |
| 349 | IS | Vlădeni       | Scrunțar I                                   | 47°28'5.04" N  | 27°18'28.24" E | -     | Sp4 | L4  |
| 350 | IS | Vlădeni       | Scrunțar II                                  | 47°28'36.70" N | 27°18'29.42" E | -     | Sp5 | L4  |
| 351 | IS | Vlădeni       | Roșcani Forest                               | 47°27'41.81" N | 27°21'54.36" E | 11-15 | Sp6 | L1  |
| 352 | IS | Vlădeni       | Movila gării                                 | 47°24'22.31" N | 27°18'52.32" E | 1-5   | Sp1 | L10 |
| 353 | BT | Vlăsinești    | Ghițălăria                                   | 47°53'34.62" N | 26°51'58.26" E | 6-10  | Sp1 | L8  |
| 354 | BT | Vlăsinești    | Iazul de la Odaie                            | 47°52'24.98" N | 26°52'56.54" E | 11-15 | Sp4 | L4  |
| 355 | IS | Voinești      | Chiclui Pond                                 | 47°4'34.17" N  | 27°28'3.51" E  | -     | Sp6 | L3  |
| 356 | IS | Voinești      | La Vest de școală                            | 47°5'1.26" N   | 27°27'20.22" E | -     | Sp1 | L8  |
| 357 | IS | Voinești      | Siliște                                      | 47°4'47.65" N  | 27°28'59.85" E | 1-5   | Sp1 | L8  |
| 358 | IS | Voinești      | Gârla Pădurariului                           | 47°3'59.57" N  | 27°27'9.69" E  | 1-5   | Sp6 | L2  |
| 359 | IS | Voinești      | La basculă                                   | 47°4'5.32" N   | 27°28'10.45" E | 1-5   | Sp1 | L8  |
| 360 | BT | Vorniceni     | Caradica/Vârlant/Săvescu Hill                | 47°57'48" N    | 26°40'43" E    | 6-10  | Sp1 | L9  |
| 361 | BT | Vorniceni     | Ibăneasa                                     | 47°59'59.65" N | 26°39'53.14" E | 6-10  | Sp1 | L8  |
| 362 | BT | Vorniceni     | Odaie/Fața Coșarului                         | 48°0'30" N     | 26°39'5" E     | -     | Sp2 | L7  |
